# Supplementary material for: A diarylethene-based “on–off–on” fluorescence sensor for the sequential recognition of mercury and cysteine
Source: Royal Society of Chemistry journal article supplement (doi:10.1039/c6ra27773j), 2017-01-01

## A diarylethene-based “on-off-on” fluorescence sensor for the sequential recognition of Mercury and Cysteine

Gang Li, Lele Ma, Gang Liu\*, Congbin Fan, Shouzhi Pu\*

*Jiangxi Key Laboratory of Organic Chemistry, Jiangxi Science & Technology Normal University,  
Nanchang 330013, PR China*

**\*Corresponding author:** E-mail address: [pushouzhi@tsinghua.org.cn](mailto:pushouzhi@tsinghua.org.cn); Tel. & Fax: +86-791-83831996.

### Contents

1.  $^1\text{H}$  NMR,  $^{13}\text{C}$  NMR and  $^{19}\text{F}$  NMR copies of **10**
2. The IR spectra of **10**
3. The photoconversion ratios of diarylethene **1**
4. The binding constant and the limit of detection (LOD) of **10** with  $\text{Hg}^{2+}$
5.  $^1\text{H}$  NMR and  $^{13}\text{C}$  NMR copies of **NBTZ**, **QBOZ** and **QBTZ**
6. The fluorescence spectrum of the precursor **3**, **NBTZ**, **QBOZ** and **QBTZ** effected by  $\text{Hg}^{2+}$
7. The ESI-MS spectra of **10** and **10'**
8. The fluorescence spectrum of the other organic thiol compounds effected by **10'** (Ethylene Mercaptan(A), 2-Aminothiophenol (B) and 2-Aminoethanethiol (C))
9. The ESI-MS spectra of **10** and **10'**
10. The binding constant and the limit of detection (LOD) of **10'** with Cys

1.  $^1\text{H}$  NMR,  $^{13}\text{C}$  NMR and  $^{19}\text{F}$  NMR copies of **10**

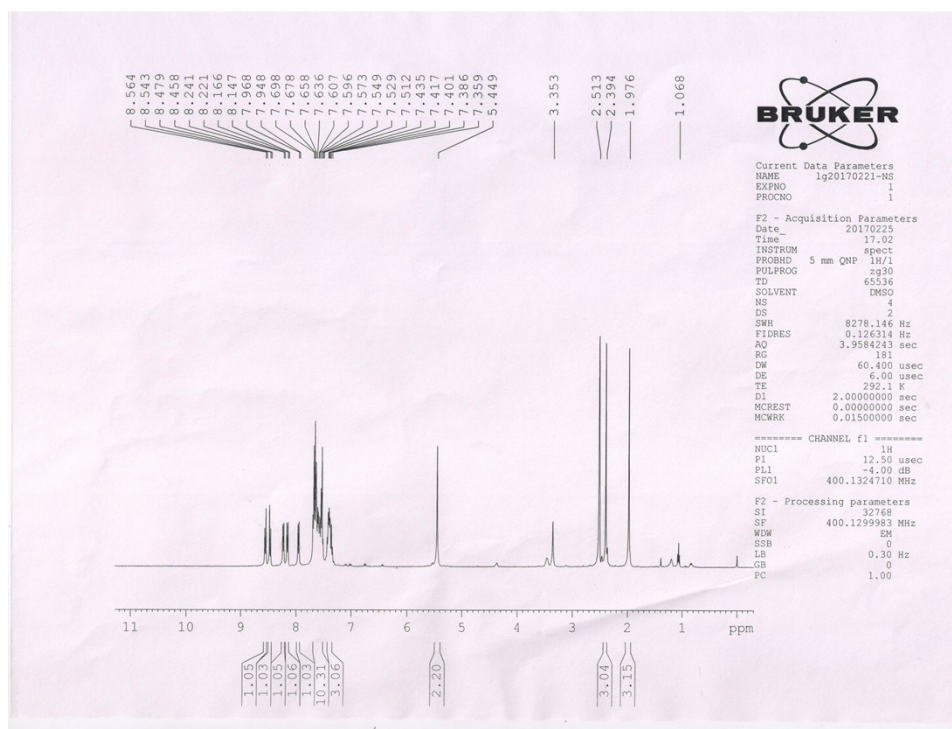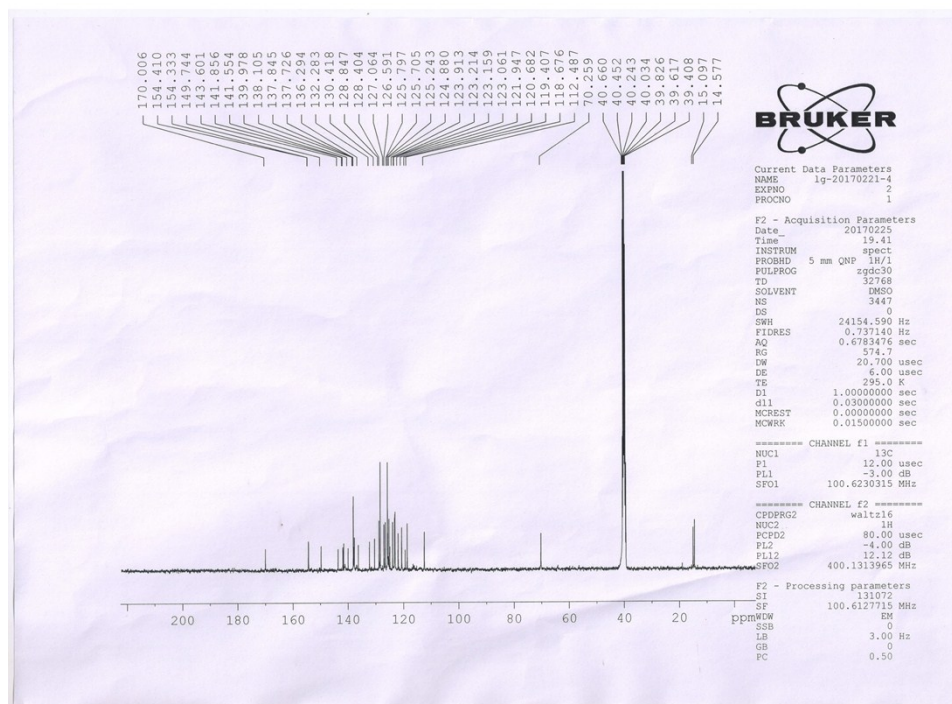

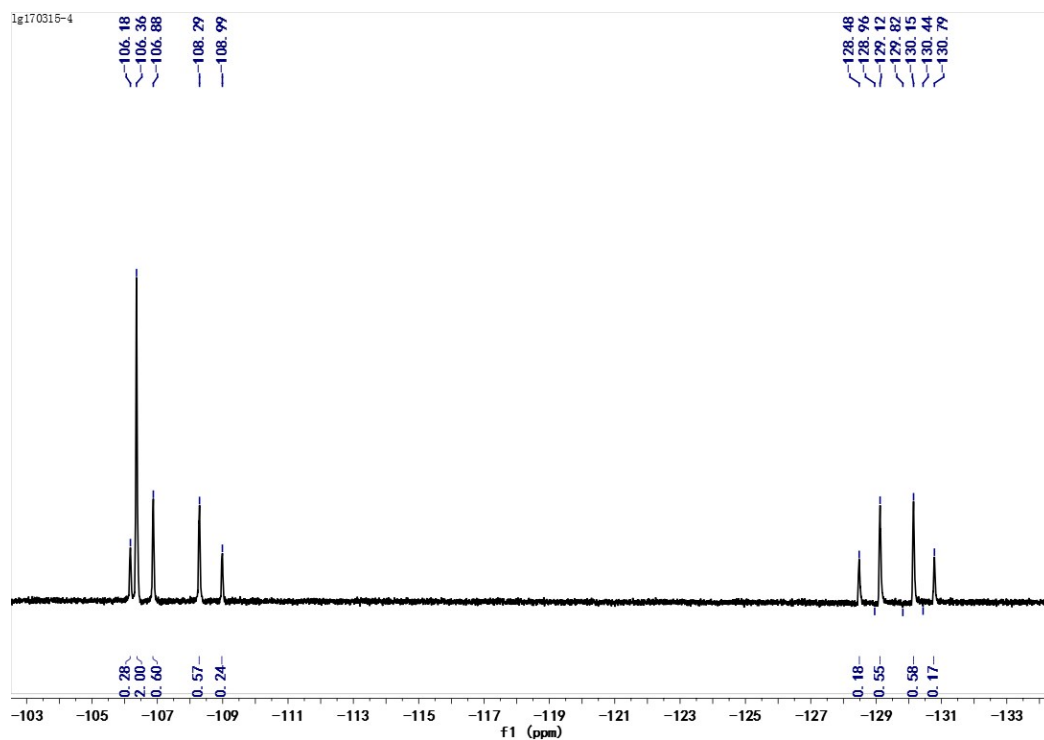

## 2. The FTIR spectra of **10**

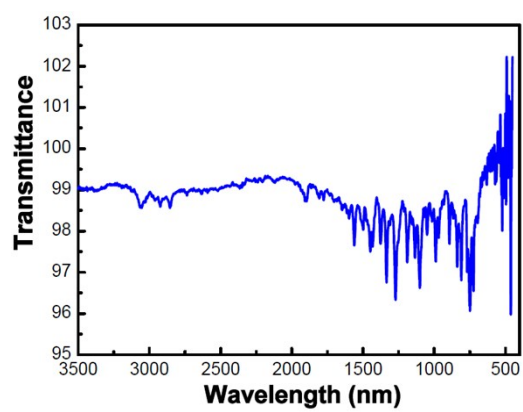

3. The photoconversion ratios of diarylethene **1**

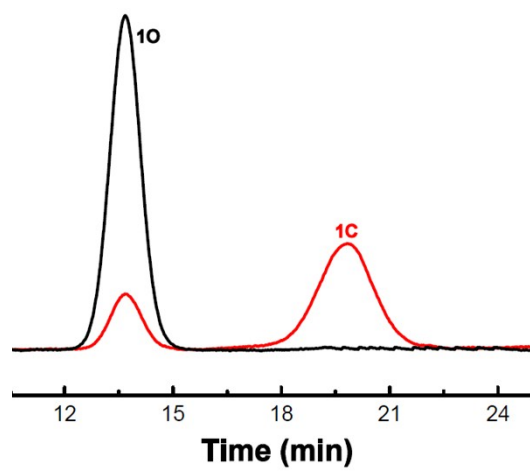

4. The binding constant and the limit of detection (LOD) of **10** with  $\text{Hg}^{2+}$

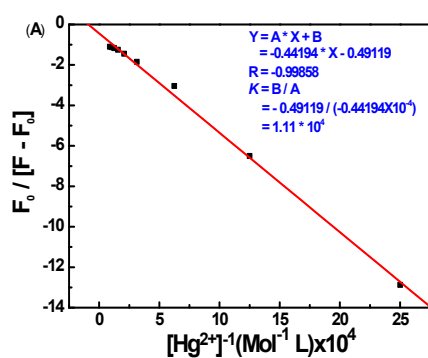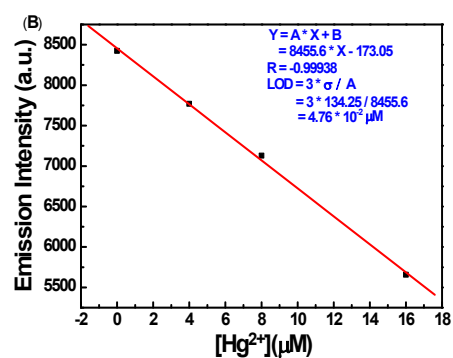

5.  $^1\text{H}$  NMR and  $^{13}\text{C}$  NMR copies of **NBTZ**, **QBOZ** and **QBTZ**

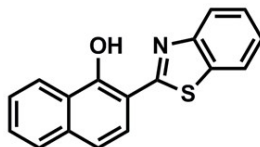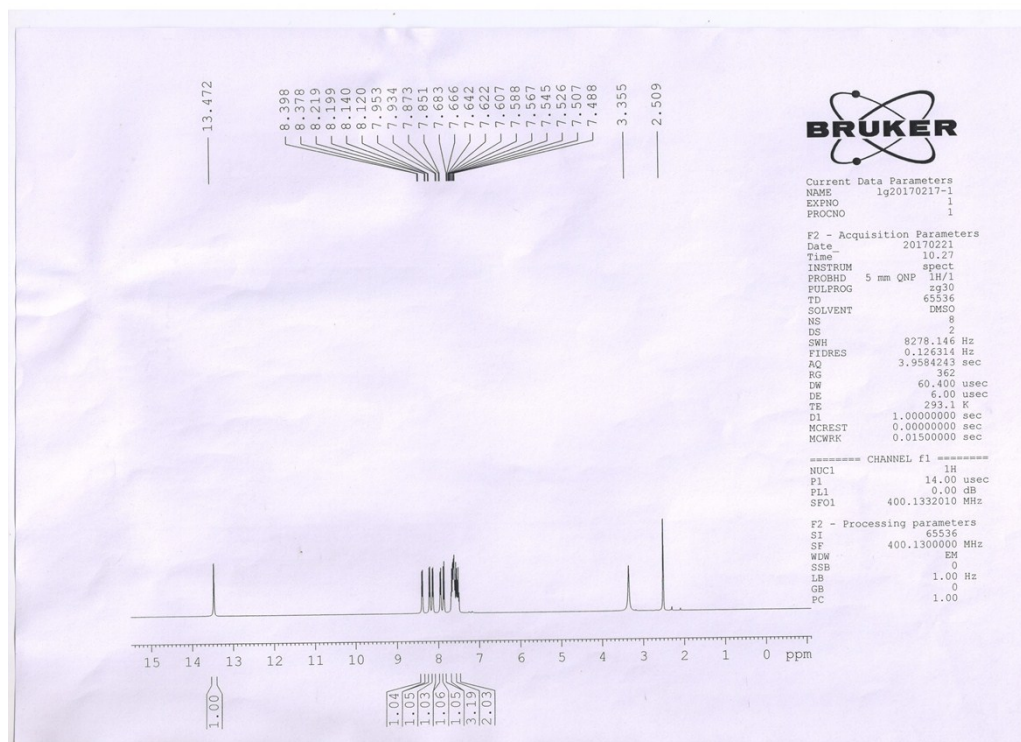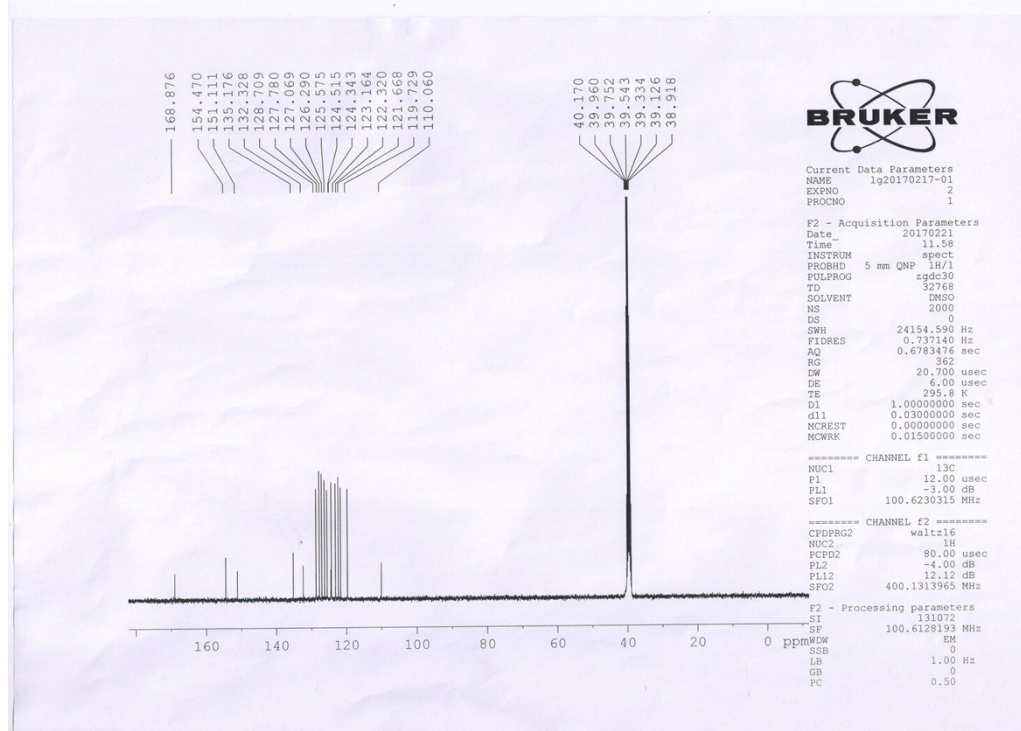

The  $^1\text{H}$  NMR,  $^{13}\text{C}$  NMR of naphthol-benzothiazole moiety(**NBTZ**)



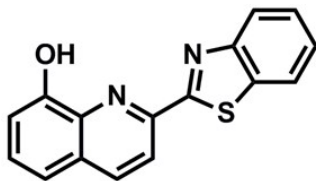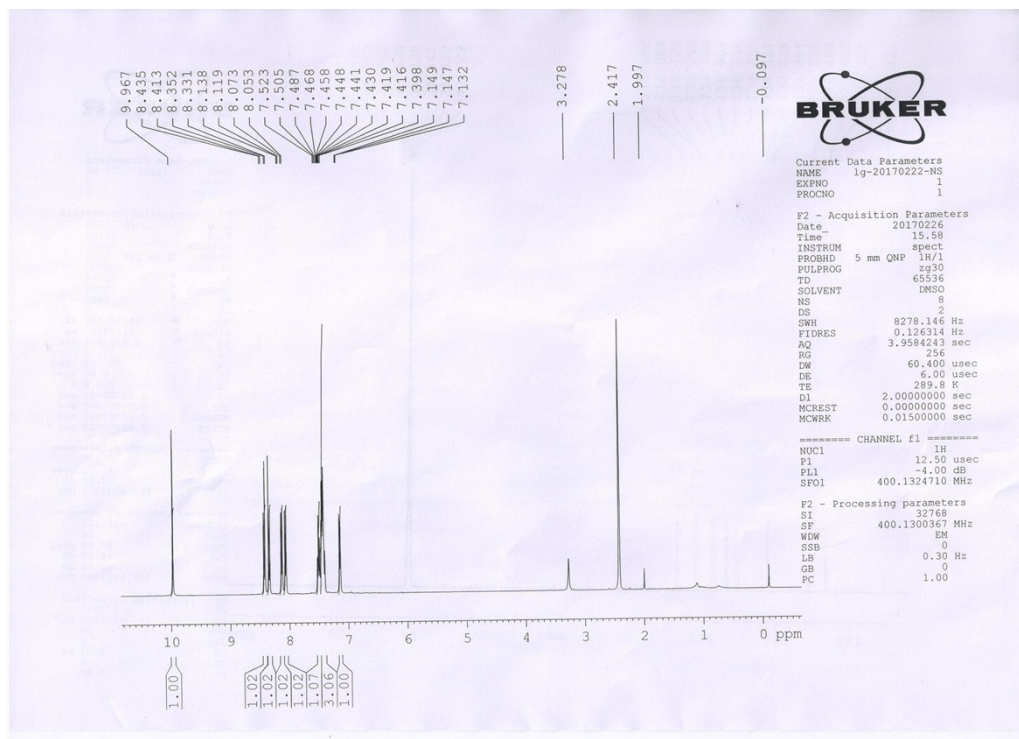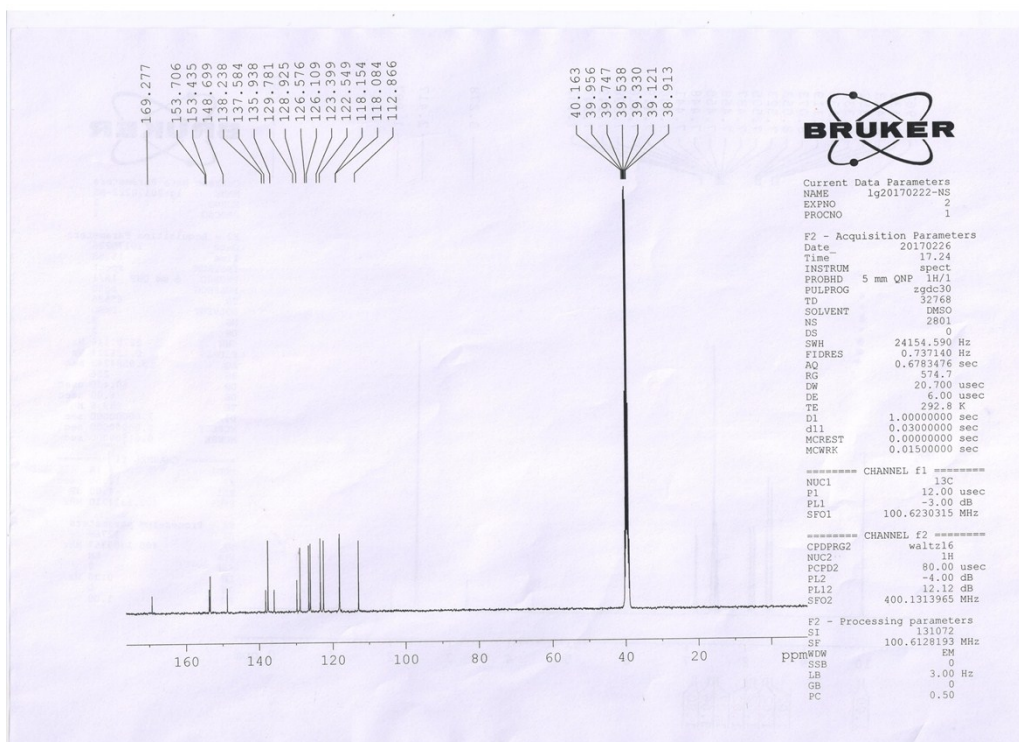

The  $^1\text{H}$  NMR,  $^{13}\text{C}$  NMR of quinolinol-benzothiazole(QBTZ)



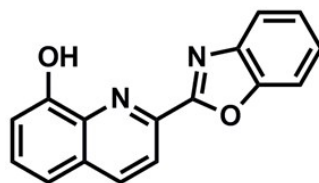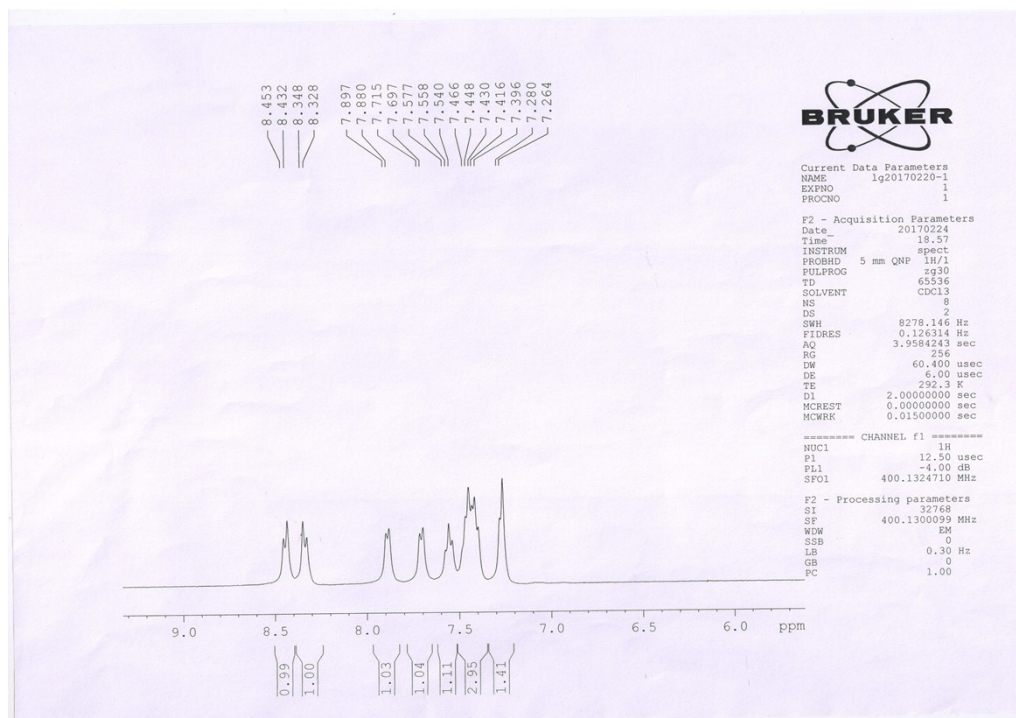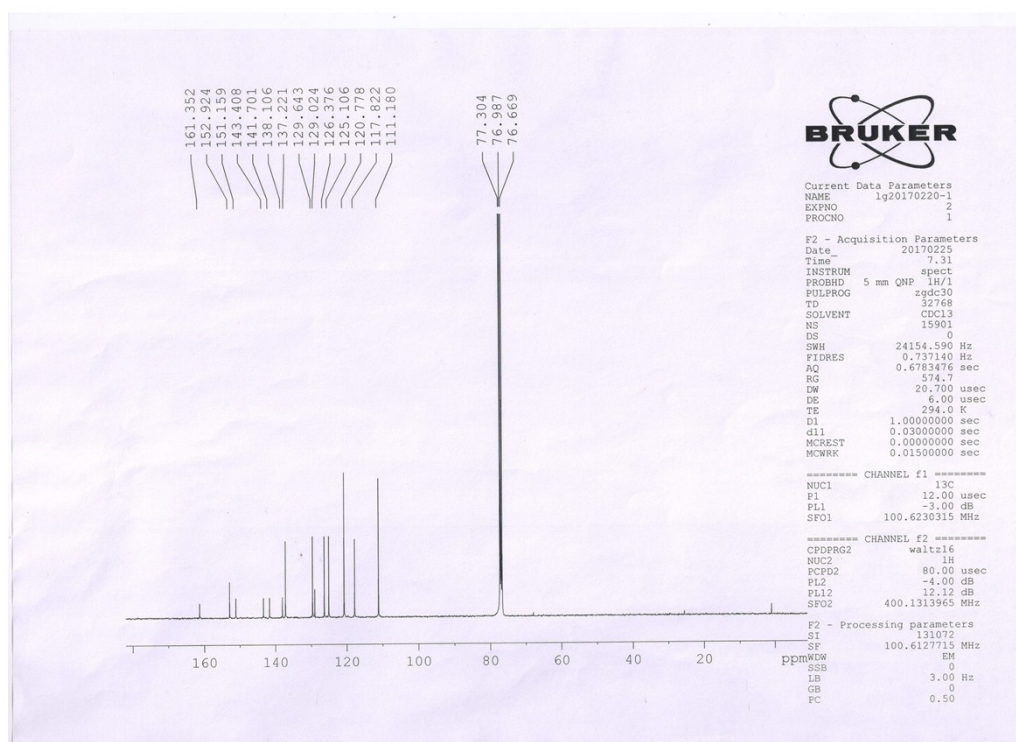

The  $^1\text{H}$  NMR,  $^{13}\text{C}$  NMR of quinolinol-benzoxazole moiety (QBOZ)

6. The fluorescence spectrum of the precursor **3**, **NBTZ**, **QBOZ** and **QBTZ** effected by  $\text{Hg}^{2+}$

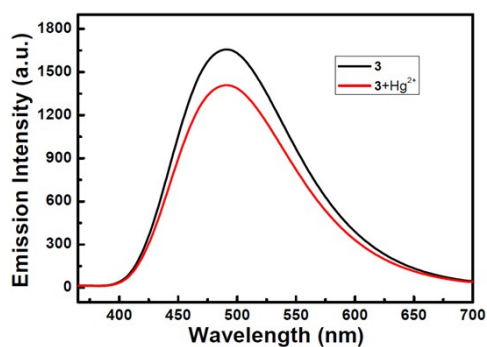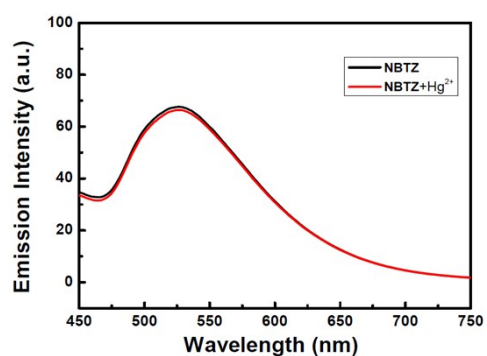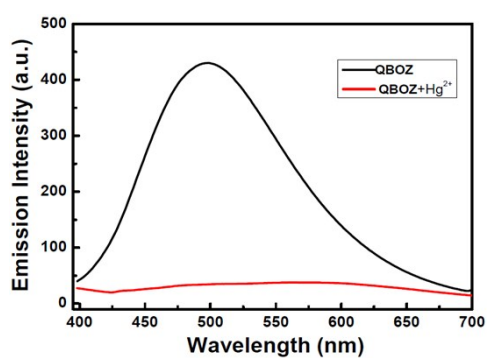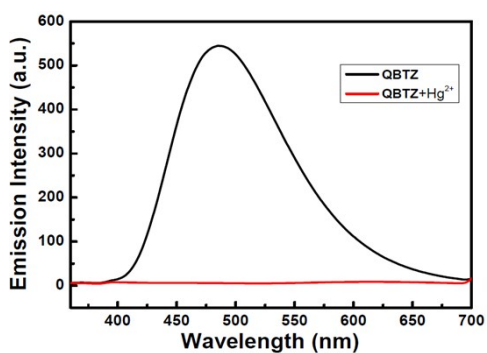

7. The ESI-MS spectra of **1O** and **1O'**

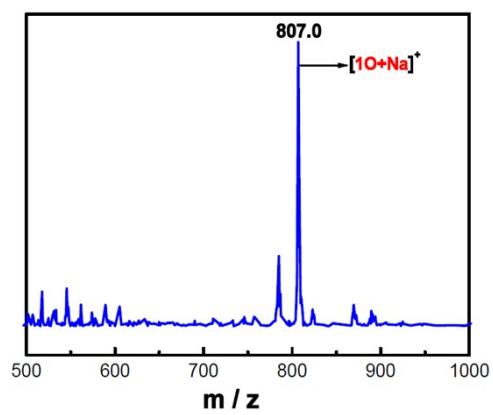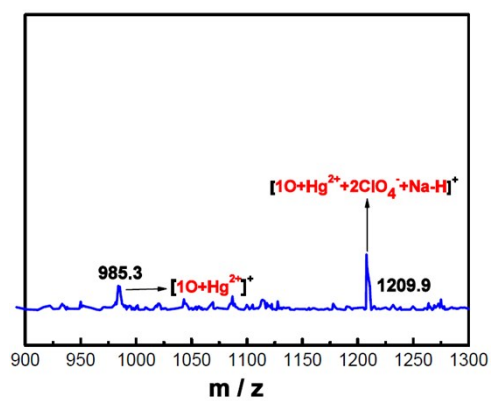

8. The fluorescence spectrum of the other organic thiol compounds effected by **10'** (Ethylene Mercaptan(A), 2-Aminothiophenol (B) and 2-Aminoethanethiol (C))

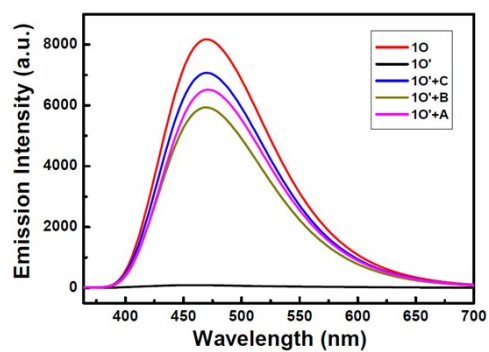

9. The ESI-MS spectra of **10'** + Cys

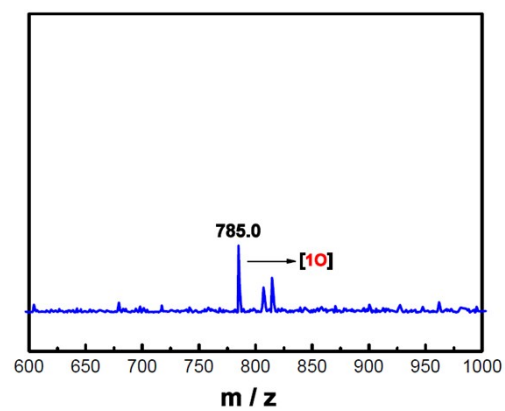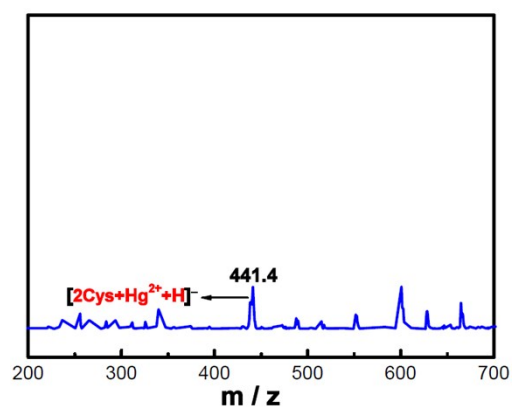

10. The binding constant and the limit of detection (LOD) of **10'** with Cys

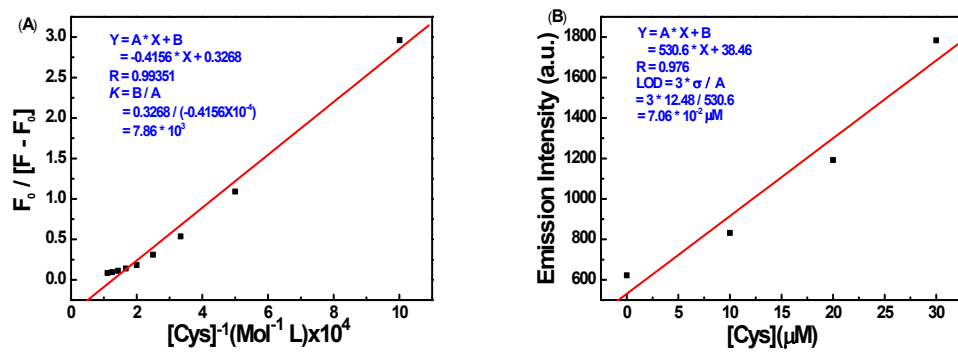

Supplement: c6ra27773j1.pdf [file c6ra27773j1.pdf]
